# Supplementary material for: Metabolic profiling of the human response to a glucose challenge reveals distinct axes of insulin sensitivity
Source: PubMed Central journal article supplement — Mol Syst Biol. 2008 Aug 5;4:214. doi: 10.1038/msb.2008.50 (PMC2538910; doi:10.1038/msb.2008.50), 2008-08-05
Supplement: msb200850-s1.pdf [file msb200850-s1.pdf]

## Supplementary data 1 - Contents:

Item 1: HPLC method

Item 2: Mass spectrometry method

Item 3: Metabolite interferences

Item 4: Reproducibility of metabolite measurement in plasma

Item 5: Chemical classes of monitored metabolites

Item 6: Metabolites reported in the main text

Item 7: Metabolites detected in plasma

Item 8: Metabolites monitored but not detected in plasma

## Item 1: HPLC method

Three different HPLC systems were used sequentially in time, and connected to the mass spectrometer in parallel. All columns were purchased from Phenomenex (Torrance, CA).

The following table lists the parameters of each HPLC system:

|                                             | <b>System 1</b>                                                                                                                 | <b>System 2</b>                                                                                                                                                                                                | <b>System 3</b>                                                                                                                              |
|---------------------------------------------|---------------------------------------------------------------------------------------------------------------------------------|----------------------------------------------------------------------------------------------------------------------------------------------------------------------------------------------------------------|----------------------------------------------------------------------------------------------------------------------------------------------|
| <b>Mobile Phase</b>                         | <b>A<sup>a</sup>:</b><br>99.9% water<br>0.1% acetic acid<br><br><b>B<sup>b</sup>:</b><br>99.9% acetonitrile<br>0.1% acetic acid | <b>A:</b><br>79.75% water<br>20% acetonitrile<br>0.25% ammonium hydroxide<br>10 mM ammonium acetate<br><br><b>B:</b><br>79.75% acetonitrile<br>20% water<br>0.25% ammonium hydroxide<br>10 mM ammonium acetate | <b>A:</b><br>95% water<br>5% acetonitrile<br>5 mM ammonium acetate<br><br><b>B:</b><br>95% acetonitrile<br>5% water<br>5 mM ammonium acetate |
| <b>Column</b>                               | Luna phenyl-hexyl (4.6x50 mm, 5 $\mu$ m)                                                                                        | Luna Amino (4.6x50 mm, 5 $\mu$ m)                                                                                                                                                                              | Synergi Polar-RP (4.6x50 mm, 4 $\mu$ m)                                                                                                      |
| <b>Gradient</b>                             | From 0%B and 1 mL/min to 90%B and 2 mL/min in 0.7 minutes                                                                       | From 100%B and 1.5 mL/min to 0%B and 2.5 mL/min in 1.6 minutes                                                                                                                                                 | From 5%B and 1 mL/min to 95%B and 2 mL/min in 2.65 minutes                                                                                   |
| <b>Total Run Time (minutes)</b>             | 1.4                                                                                                                             | 3.4                                                                                                                                                                                                            | 3.75                                                                                                                                         |
| <b>Injection Volume (<math>\mu</math>L)</b> | 5                                                                                                                               | 10                                                                                                                                                                                                             | 10                                                                                                                                           |

<sup>a</sup> A: Aqueous phase

<sup>b</sup> B: Organic phase.

## **Item 2: Mass spectrometry method**

A Turbo electrospray ionization source was used. The ion spray potentials were 5,000 volt in the positive mode and 4,200 volt in the negative mode. Zero air was used for the nebulizer and bath gases, and N<sub>2</sub> was used for the curtain and collision gases. The gas pressures used were 50 psi for the nebulizer gas, 60 psi for the bath gas, 20 psi for the curtain gas and 7 psi for the collision gas. The bath gas temperature was 400 °C.

### **Item 3: Metabolite interferences**

The HPLC-MS/MS method was unable to distinguish between a few of the reported metabolites and other tested metabolites, due to a combination of isobaric overlap and insufficient chromatographic resolution. Leucine and isoleucine were indistinguishable, and are therefore always mentioned together in the text. In the other instances of sets of indistinguishable metabolites, one of the metabolites in the set was likely to be present in the samples in much higher concentrations than the rest of the set, based on published concentrations in human plasma and given the nature of an oral glucose tolerance test. In these instances, it was assumed that the effect of the non-prevalent metabolites on the measurement was negligible, and only the prevalent metabolite was reported in the main text. The sets of indistinguishable metabolites involving a reported metabolite are listed below, with the prevalent metabolite first: {glucose, galactose, fructose}, { $\beta$ -hydroxybutyrate, malonate}, and {valine, guanidinoacetate}.

#### Item 4: Reproducibility of metabolite measurement in plasma

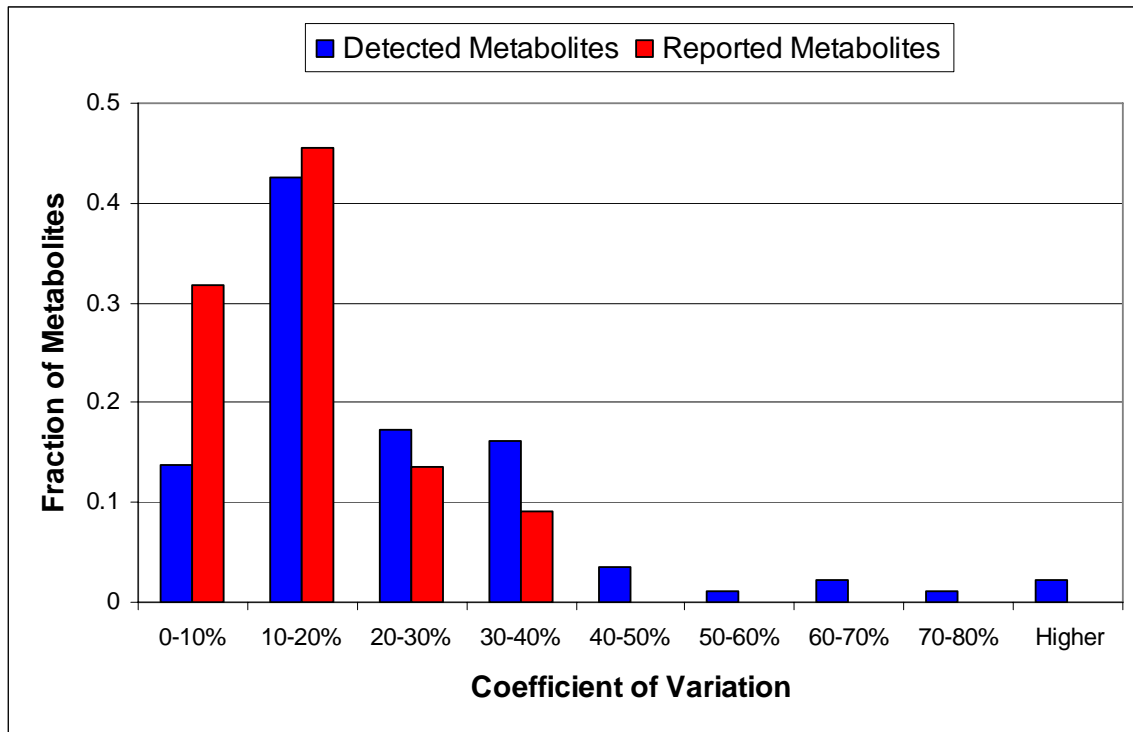

The variation associated with plasma sample preparation and LC-MS/MS analysis was assessed by splitting one plasma sample into 7 parts and processing each part separately. The coefficient of variation (CV) equals the standard deviation of metabolite level divided by the mean metabolite level. The CV distribution of metabolites reported in the main text (red bars, Item 6 below) is compared to the distribution of all detected metabolites (blue bars, Item 7 below).

## Item 5: Chemical classes of monitored metabolites

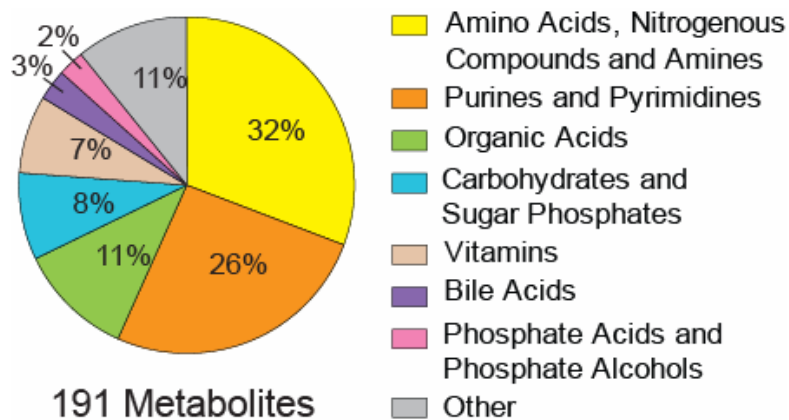

The chemical classification is based on the chemical taxonomy annotation in the Human Metabolome Database (Wishart, D.S. et al. HMDB: the Human Metabolome Database.

Nucleic Acids Res 35, D521-526 (2007).

## Item 6: Metabolites reported in the main text

| Metabolite Name            | Q1 <sup>a</sup> | Q3 <sup>b</sup> | DP <sup>c</sup> | CE <sup>d</sup> | IP <sup>e</sup> | HPLC <sup>f</sup> | Standard Source          | Standard Catalog Number |
|----------------------------|-----------------|-----------------|-----------------|-----------------|-----------------|-------------------|--------------------------|-------------------------|
| Alanine                    | 90.0            | 44.0            | 25              | 15              | +               | 1                 | Sigma <sup>g</sup>       | A-7627                  |
| Arginine                   | 175.1           | 70.0            | 25              | 30              | +               | 1                 | Sigma                    | A-5131                  |
| $\beta$ -hydroxybutyrate   | 103.0           | 59.0            | -40             | -15             | -               | 3                 | Sigma                    | 54920                   |
| Citrulline                 | 174.1           | 131.0           | -50             | -15             | -               | 3                 | Sigma                    | 27510                   |
| Glucose                    | 179.1           | 89.0            | -50             | -15             | -               | 2                 | Sigma                    | 49159                   |
| Glycerol                   | 93.0            | 57.0            | 20              | 21              | +               | 1                 | Shelton Scientific - IBI | IB15762                 |
| Glycochenodeoxycholic acid | 448.3           | 74.0            | -80             | -60             | -               | 3                 | Sigma                    | G0759                   |
| Glycocholic acid           | 464.3           | 74.0            | -30             | -60             | -               | 3                 | Sigma                    | G2878                   |
| Hippuric acid              | 178.1           | 134.0           | -50             | -16             | -               | 3                 | Sigma                    | 112003                  |
| Histidine                  | 156.1           | 110.0           | 25              | 23              | +               | 1                 | Sigma                    | H-8125                  |
| Hypoxanthine               | 135.0           | 92.0            | -50             | -23             | -               | 3                 | Sigma                    | 56700                   |
| Isoleucine                 | 132.1           | 86.0            | 50              | 20              | +               | 1                 | Sigma                    | I-2752                  |
| Lactate                    | 89.0            | 43.0            | -40             | -20             | -               | 2                 | Sigma                    | 69771                   |
| Leucine                    | 132.1           | 86.0            | 50              | 20              | +               | 1                 | Sigma                    | L-8000                  |
| Lysine                     | 147.1           | 84.0            | 25              | 25              | +               | 1                 | Sigma                    | G-3126                  |
| Malate                     | 133.0           | 115.0           | -40             | -20             | -               | 3                 | Sigma                    | M-0750                  |
| Methionine                 | 150.1           | 61.0            | 40              | 30              | +               | 1                 | Sigma                    | M-9625                  |
| Ornithine                  | 133.1           | 70.0            | 40              | 30              | +               | 1                 | Sigma                    | 75480                   |
| Phenylalanine              | 166.1           | 120.0           | 50              | 17              | +               | 1                 | Sigma                    | P-2126                  |
| Pyruvate                   | 87.0            | 43.0            | -30             | -12             | -               | 3                 | Sigma                    | 107360                  |
| Taurochenodeoxycholic acid | 498.3           | 80.0            | -90             | -90             | -               | 3                 | Sigma                    | 86335                   |
| Tyrosine                   | 182.1           | 136.5           | 25              | 17              | +               | 1                 | Sigma                    | T-3754                  |
| Valine                     | 118.1           | 72.0            | 25              | 20              | +               | 1                 | Sigma                    | V-0500                  |
| Xanthine                   | 151.0           | 108.0           | -40             | -30             | -               | 2                 | Sigma                    | 95490                   |

<sup>a</sup> Q1: precursor ion mass, in daltons (Da)

<sup>b</sup> Q3: product ion mass, in daltons (Da)

<sup>c</sup> DP: De-clustering Potential, in volts (V)

<sup>d</sup> CE: Collision Energy, in volts (V)

<sup>e</sup> IP: Ionization Polarity

<sup>f</sup> HPLC: the HPLC system in which the metabolite was measured. See the HPLC section (Item 1 above) for the parameters of each system.

<sup>g</sup> Sigma: Sigma-Aldrich Co.

**Item 7: Metabolites detected in plasma**  
**(metabolite #1-97)**

Column description:

**KEGG:** Compound ID from the Kyoto Encyclopedia of Genes and Genomes,  
<http://www.genome.ad.jp>

**Q1:** precursor ion mass, in daltons (Da)

**Q3:** product ion mass, in daltons (Da)

**HPLC:** the HPLC system in which the metabolite was measured

**CV:** Coefficient of variation of plasma sample analysis

The name used for a metabolite in the main text is in square brackets  
(if different from KEGG)

| #  | KEGG                                    | Name                                                                                            | Q1    | Q3    | HPLC | CV |
|----|-----------------------------------------|-------------------------------------------------------------------------------------------------|-------|-------|------|----|
| 1  | C01089                                  | (R)-3-Hydroxybutanoate [ $\beta$ -hydroxybutyrate]                                              | 103.0 | 59.0  | 3    | 27 |
| 2  | C00186                                  | (S)-Lactate [Lactate]                                                                           | 89.0  | 43.0  | 2    | 7  |
| 3  | C00149                                  | (S)-Malate [Malate]                                                                             | 133.0 | 115.0 | 3    | 32 |
| 4  | C00026/<br>C06104                       | 2-Oxoglutarate/Adipate                                                                          | 145.1 | 101.0 | 3    | 20 |
| 5  | C00632                                  | 3-Hydroxyanthranilate                                                                           | 154.0 | 136.2 | 1    | 54 |
| 6  | C00197                                  | 3-Phospho-D-glycerate                                                                           | 185.0 | 97.0  | 2    | 78 |
| 7  | C01015                                  | 4-Hydroxy-L-proline                                                                             | 132.1 | 86.2  | 1    | 15 |
| 8  | C00847                                  | 4-Pyridoxate                                                                                    | 182.1 | 138.0 | 3    | 15 |
| 9  | C01996                                  | Acetylcholine                                                                                   | 146.1 | 87.0  | 1    | 18 |
| 10 | C00008                                  | ADP                                                                                             | 426.0 | 79.0  | 2    | 66 |
| 11 | C01551                                  | Allantoin                                                                                       | 159.0 | 116.0 | 1    | 13 |
| 12 | C00020                                  | AMP                                                                                             | 346.1 | 79.0  | 2    | 85 |
| 13 | C00108                                  | Anthranilate                                                                                    | 138.0 | 120.0 | 1    | 18 |
| 14 | C00002                                  | ATP                                                                                             | 506.0 | 159.0 | 3    | 34 |
| 15 | C00719                                  | Betaine                                                                                         | 118.1 | 58.0  | 1    | 14 |
| 16 | C00486                                  | Bilirubin                                                                                       | 583.3 | 285.0 | 3    | 69 |
| 17 | C00114                                  | Choline                                                                                         | 104.1 | 60.0  | 1    | 18 |
| 18 | C00417                                  | cis-Aconitate                                                                                   | 173.0 | 129.0 | 3    | 32 |
| 19 | C00158/<br>C00311                       | Citrate/Isocitrate                                                                              | 191.0 | 111.0 | 3    |    |
| 20 | C00300                                  | Creatine                                                                                        | 132.1 | 90.0  | 1    | 16 |
| 21 | C00791                                  | Creatinine                                                                                      | 114.1 | 44.0  | 1    | 14 |
| 22 | C01094/<br>C00085/<br>C00103/<br>C00668 | D-Fructose 6-phosphate/D-Glucose 1-phosphate/alpha-D-Glucose 6-phosphate/D-Fructose 1-phosphate | 259.0 | 97.0  | 2    | 18 |
| 23 | C00191                                  | D-Glucuronate                                                                                   | 193.0 | 113.0 | 3    | 27 |
| 24 | C00117/<br>C00199                       | D-Ribose 5-phosphate/D-Ribulose 5-phosphate                                                     | 229.0 | 97.0  | 3    | 33 |
| 25 | C00365                                  | dUMP                                                                                            | 307.0 | 79.0  | 3    | 29 |
| 26 | C00122/<br>C01384                       | Fumarate/Maleate                                                                                | 115.0 | 71.0  | 2    | 18 |
| 27 | C00035                                  | GDP                                                                                             | 442.0 | 79.0  | 3    | 34 |
| 28 | C00341                                  | Geranyl diphosphate                                                                             | 313.1 | 79.1  | 3    | 46 |



|    |                   |                                                  |       |       |   |    |
|----|-------------------|--------------------------------------------------|-------|-------|---|----|
| 29 | C00031/<br>C00124 | Glucose                                          | 179.1 | 89.0  | 2 | 8  |
| 30 | C00116            | Glycerol                                         | 93.0  | 57.0  | 1 | 5  |
| 31 | C00111            | Glycerone phosphate                              | 169.0 | 97.0  | 3 | 35 |
| 32 | C05466            | Glycochenodeoxycholate [GCDCA]                   | 448.3 | 74.0  | 3 | 16 |
| 33 | C01921            | Glycocholate [GCA]                               | 464.3 | 74.0  | 3 | 15 |
| 34 | C00044            | GTP                                              | 522.0 | 159.0 | 3 |    |
| 35 | C01586            | Hippurate [Hippuric acid]                        | 178.1 | 134.0 | 3 | 24 |
| 36 | C00544            | Homogentisate                                    | 167.0 | 123.0 | 3 | 30 |
| 37 | C00262            | Hypoxanthine                                     | 135.0 | 92.0  | 3 | 19 |
| 38 | C00130            | IMP                                              | 347.0 | 79.0  | 2 | 18 |
| 39 | C00294            | Inosine                                          | 267.1 | 135.0 | 3 | 30 |
| 40 | C00956            | L-2-Aminoadipate                                 | 160.1 | 116.0 | 2 | 33 |
| 41 | C00243            | Lactose                                          | 341.1 | 161.0 | 2 | 8  |
| 42 | C00041            | L-Alanine [Alanine]                              | 90.0  | 44.0  | 1 | 16 |
| 43 | C00062            | L-Arginine [Arginine]                            | 175.1 | 70.0  | 1 | 13 |
| 44 | C00152            | L-Asparagine                                     | 133.1 | 74.0  | 1 | 14 |
| 45 | C00049            | L-Aspartate                                      | 134.0 | 74.0  | 1 | 15 |
| 46 | C00327            | L-Citrulline [Citrulline]                        | 174.1 | 131.0 | 3 | 30 |
| 47 | C00097            | L-Cysteine                                       | 122.0 | 76.0  | 1 | 27 |
| 48 | C00407/<br>C00123 | Leucine/Isoleucine                               | 132.1 | 86.2  | 1 | 8  |
| 49 | C00025            | L-Glutamate                                      | 148.1 | 84.0  | 1 | 19 |
| 50 | C00064            | L-Glutamine                                      | 147.1 | 84.0  | 1 | 14 |
| 51 | C00135            | L-Histidine [Histidine]                          | 156.1 | 110.0 | 1 | 14 |
| 52 | C00155            | L-Homocysteine                                   | 136.0 | 90.0  | 1 | 17 |
| 53 | C00328            | L-Kynurenine                                     | 207.1 | 144.0 | 3 | 16 |
| 54 | C00047            | L-Lysine [Lysine]                                | 147.1 | 84.0  | 1 | 15 |
| 55 | C00073            | L-Methionine [Methionine]                        | 150.1 | 61.0  | 1 | 34 |
| 56 | C00077            | L-Ornithine [Ornithine]                          | 133.1 | 70.0  | 1 | 17 |
| 57 | C00079            | L-Phenylalanine [Phenylalanine]                  | 166.1 | 120.2 | 1 | 6  |
| 58 | C00148            | L-Proline                                        | 116.1 | 70.0  | 1 | 11 |
| 59 | C00065            | L-Serine                                         | 106.0 | 60.0  | 1 | 19 |
| 60 | C00188            | L-Threonine                                      | 120.1 | 74.0  | 1 | 18 |
| 61 | C00078            | L-Tryptophan                                     | 205.1 | 188.3 | 1 | 3  |
| 62 | C00082            | L-Tyrosine [Tyrosine]                            | 182.1 | 136.3 | 1 | 7  |
| 63 | C02170            | Methylmalonate                                   | 117.0 | 73.0  | 2 |    |
| 64 | C03406            | N-(L-Arginino)succinate                          | 291.1 | 70.0  | 1 | 46 |
| 65 | C01026            | N,N-Dimethylglycine                              | 104.1 | 58.0  | 1 | 19 |
| 66 | C00003            | NAD+                                             | 662.1 | 540.0 | 2 |    |
| 67 | C03626            | NG,NG-Dimethyl-L-arginine (asymmetric)           | 201.1 | 156.0 | 3 | 36 |
| 68 | C03626            | NG,NG-Dimethyl-L-arginine (asymmetric/symmetric) | 203.1 | 70.3  | 1 | 36 |
| 69 | Not found         | NG,NG-Dimethyl-L-arginine (symmetric)            | 201.1 | 131.0 | 3 |    |
| 70 | C03884            | Ngamma-Monomethyl-L-arginine                     | 189.1 | 70.0  | 1 |    |
| 71 | C00153            | Nicotinamide                                     | 123.0 | 80.0  | 1 | 13 |
| 72 | C00295            | Orotate                                          | 155.0 | 111.0 | 3 | 31 |
| 73 | C01103            | Orotidine 5'-phosphate                           | 367.0 | 323.1 | 2 |    |
| 74 | C00209            | Oxalate                                          | 89.0  | 61.0  | 3 | 33 |
| 75 | C00036            | Oxaloacetate                                     | 131.0 | 87.0  | 3 | 24 |
| 76 | C00127            | Oxidized glutathione                             | 611.2 | 306.0 | 2 |    |

|    |                   |                                |       |       |   |     |
|----|-------------------|--------------------------------|-------|-------|---|-----|
| 77 | C00864            | Pantothenate                   | 218.1 | 88.0  | 3 | 46  |
| 78 | C00166            | Phenylpyruvate                 | 163.0 | 91.0  | 2 | 29  |
| 79 | C03722            | Pyridine-2,3-dicarboxylate     | 166.0 | 122.0 | 2 | 25  |
| 80 | C00314            | Pyridoxine                     | 170.1 | 152.2 | 1 | 7   |
| 81 | C00022            | Pyruvate                       | 87.0  | 43.0  | 3 |     |
| 82 | C00780            | Serotonin                      | 177.1 | 160.0 | 1 | 25  |
| 83 | C00093            | sn-Glycerol 3-phosphate        | 171.0 | 79.0  | 2 | 9   |
| 84 | C00042            | Succinate                      | 117.0 | 73.0  | 3 | 33  |
| 85 | C00245            | Taurine                        | 126.0 | 108.0 | 1 | 14  |
| 86 | C05465            | Taurochenodeoxycholate [TCDCA] | 498.3 | 80.0  | 3 | 17  |
| 87 | C00068            | Thiamin diphosphate            | 423.0 | 303.2 | 2 | 9   |
| 88 | C01104            | Trimethylamine N-oxide         | 76.1  | 58.0  | 1 | 19  |
| 89 | C00015            | UDP                            | 403.0 | 79.0  | 3 | 36  |
| 90 | C00029/<br>C00052 | UDPglucose/UDP-D-galactose     | 565.1 | 323.0 | 2 | 132 |
| 91 | Not found         | Unidentified peak              | 149.0 | 87.0  | 3 | 26  |
| 92 | C00106            | Uracil                         | 111.0 | 42.0  | 2 | 24  |
| 93 | C00366            | Urate                          | 167.0 | 124.0 | 3 | 24  |
| 94 | C00299            | Uridine                        | 243.1 | 110.0 | 2 | 16  |
| 95 | C00075            | UTP                            | 483.0 | 159.0 | 3 |     |
| 96 | C00183/<br>C00581 | Valine                         | 118.1 | 72.0  | 1 | 7   |
| 97 | C00385            | Xanthine                       | 151.0 | 108.0 | 2 | 11  |

**Item 8: Metabolites monitored but not detected in plasma  
(metabolite #98-191)**

Column description:

**KEGG:** Compound ID from the Kyoto Encyclopedia of Genes and Genomes,  
<http://www.genome.ad.jp>

**Q1:** precursor ion mass, in daltons (Da)

**Q3:** product ion mass, in daltons (Da)

**HPLC:** the HPLC system in which the metabolite was measured

| #   | KEGG              | Name                                   | Q1    | Q3    | HPLC |
|-----|-------------------|----------------------------------------|-------|-------|------|
| 98  | C00631            | 2-Phospho-D-glycerate                  | 185.0 | 79.1  | 3    |
| 99  | C01179            | 3-(4-Hydroxyphenyl)pyruvate            | 179.0 | 107.0 | 3    |
| 100 | C00575            | 3',5'-Cyclic AMP                       | 328.1 | 134.0 | 2    |
| 101 | C00942            | 3',5'-Cyclic GMP                       | 344.0 | 150.0 | 3    |
| 102 | C05145            | 3-Aminoisobutanoate                    | 104.1 | 86.0  | 1    |
| 103 | C03227            | 3-Hydroxy-L-kynurenine                 | 223.1 | 162.0 | 3    |
| 104 | C05594            | 3-Methoxy-4-hydroxyphenylethyleneglyco | 183.1 | 150.0 | 2    |
| 105 | Not found         | 3-Nitro-L-tyrosine                     | 227.1 | 181.3 | 1    |
| 106 | C02642            | 3-Ureidopropionate                     | 133.1 | 115.0 | 1    |
| 107 | C00334            | 4-Aminobutanoate                       | 104.1 | 87.0  | 1    |
| 108 | C00156            | 4-Hydroxybenzoate                      | 137.0 | 93.0  | 3    |
| 109 | C03479            | 5-Formyltetrahydrofolate               | 472.2 | 315.0 | 2    |
| 110 | C05635            | 5-Hydroxyindoleacetate                 | 190.1 | 146.0 | 2    |
| 111 | C00643            | 5-Hydroxy-L-tryptophan                 | 221.1 | 204.0 | 1    |
| 112 | C00440            | 5-Methyltetrahydrofolate               | 458.2 | 329.0 | 2    |
| 113 | C00164            | Acetoacetate                           | 101.0 | 57.0  | 2    |
| 114 | C00024            | Acetyl-CoA                             | 403.6 | 79.0  | 3    |
| 115 | C00147            | Adenine                                | 134.1 | 107.0 | 2    |
| 116 | C00212            | Adenosine                              | 266.1 | 134.0 | 2    |
| 117 | C03794            | Adenylosuccinate                       | 462.1 | 79.0  | 3    |
| 118 | C00072            | Ascorbate                              | 175.0 | 115.0 | 3    |
| 119 | C00120            | Biotin                                 | 243.1 | 200.0 | 2    |
| 120 | C00487            | Carnitine                              | 163.1 | 85.0  | 1    |
| 121 | C00386            | Carnosine                              | 227.1 | 110.0 | 1    |
| 122 | C00112            | CDP                                    | 402.0 | 158.9 | 3    |
| 123 | C02528            | Chenodeoxycholate                      | 391.3 | 373.5 | 2    |
| 124 | C00695            | Cholate                                | 407.3 | 343.0 | 3    |
| 125 | C00055            | CMP                                    | 322.1 | 79.0  | 2    |
| 126 | Not found         | Cotinine                               | 177.1 | 80.0  | 1    |
| 127 | C00063            | CTP                                    | 482.0 | 159.0 | 3    |
| 128 | C02823            | Cyanocobalamin                         | 678.3 | 147.3 | 1    |
| 129 | Not found         | Cystamine                              | 153.0 | 108.0 | 1    |
| 130 | C01678            | Cysteamine                             | 78.0  | 61.0  | 1    |
| 131 | C00475            | Cytidine                               | 244.1 | 112.0 | 1    |
| 132 | C00380/<br>C00388 | Cytosine/Histamine                     | 112.0 | 95.0  | 1    |
| 133 | C00705            | dCDP                                   | 386.0 | 79.0  | 3    |

|     |                              |                                                                                    |       |       |   |
|-----|------------------------------|------------------------------------------------------------------------------------|-------|-------|---|
| 134 | C00239                       | dCMP                                                                               | 306.1 | 79.0  | 3 |
| 135 | C00458                       | dCTP                                                                               | 466.0 | 159.0 | 3 |
| 136 | C00559                       | Deoxyadenosine                                                                     | 252.1 | 136.3 | 1 |
| 137 | C00881                       | Deoxycytidine                                                                      | 228.1 | 73.0  | 1 |
| 138 | C00526                       | Deoxyuridine                                                                       | 229.1 | 113.0 | 1 |
| 139 | C00095                       | D-Fructose                                                                         | 179.1 | 89.0  | 2 |
| 140 | C05378/<br>C00665/<br>C00660 | D-Fructose 1,6-bisphosphate/D-Fructose 2,6-bisphosphate/D-Glucose 1,6-bisphosphate | 339.0 | 79.0  | 3 |
| 141 | C00577                       | D-Glyceraldehyde                                                                   | 89.0  | 59.0  | 2 |
| 142 | C00415                       | Dihydrofolate                                                                      | 442.2 | 176.0 | 2 |
| 143 | C03758                       | Dopamine                                                                           | 154.1 | 137.2 | 1 |
| 144 | C00794                       | D-Sorbitol                                                                         | 181.1 | 89.0  | 2 |
| 145 | C00364                       | dTMP                                                                               | 321.1 | 195.0 | 3 |
| 146 | C00459                       | dTTP                                                                               | 481.0 | 383.0 | 3 |
| 147 | C00460                       | dUTP                                                                               | 467.0 | 370.0 | 3 |
| 148 | C05589                       | Epinephrine/Normetanephrine                                                        | 184.1 | 166.3 | 1 |
| 149 | C00346                       | Ethanolamine phosphate                                                             | 142.0 | 44.0  | 1 |
| 150 | C00504                       | Folate                                                                             | 440.1 | 311.0 | 3 |
| 151 | C00051                       | Glutathione                                                                        | 306.1 | 143.0 | 2 |
| 152 | C00037                       | Glycine                                                                            | 76.0  | 30.5  | 1 |
| 153 | C00144                       | GMP                                                                                | 362.1 | 79.0  | 3 |
| 154 | C00242                       | Guanine                                                                            | 150.0 | 133.0 | 2 |
| 155 | C00387                       | Guanosine                                                                          | 282.1 | 150.1 | 2 |
| 156 | C01817                       | Homocystine                                                                        | 267.1 | 132.0 | 3 |
| 157 | C05582                       | Homovanillate                                                                      | 181.1 | 137.1 | 2 |
| 158 | C01717                       | Kynurenate                                                                         | 188.0 | 144.0 | 2 |
| 159 | C01724                       | Lanosterol                                                                         | 425.4 | 212.1 | 2 |
| 160 | C02291                       | L-Cystathionine                                                                    | 221.1 | 134.0 | 3 |
| 161 | C00263                       | L-Homoserine                                                                       | 120.1 | 74.2  | 1 |
| 162 | C05588                       | L-Metanephrine                                                                     | 198.1 | 180.5 | 1 |
| 163 | C05589                       | L-Normetanephrine                                                                  | 184.1 | 134.0 | 1 |
| 164 | C00083                       | Malonyl-CoA                                                                        | 425.6 | 79.0  | 3 |
| 165 | C01598                       | Melatonin                                                                          | 233.1 | 174.3 | 1 |
| 166 | Not found                    | Methylhydroxyisobutyrate                                                           | 119.1 | 87.0  | 1 |
| 167 | C00137                       | myo-Inositol                                                                       | 179.1 | 81.0  | 2 |
| 168 | C00004                       | NADH                                                                               | 664.1 | 408.0 | 2 |
| 169 | C00006                       | NADP+                                                                              | 742.1 | 620.0 | 2 |
| 170 | C00005                       | NADPH                                                                              | 744.1 | 408.0 | 2 |
| 171 | C05926                       | Neopterin                                                                          | 252.1 | 192.0 | 2 |
| 172 | C00253                       | Nicotinate                                                                         | 122.0 | 78.0  | 3 |
| 173 | C01185                       | Nicotinate D-ribonucleotide                                                        | 334.0 | 290.0 | 2 |
| 174 | C05127                       | N-Methylhistamine                                                                  | 126.1 | 109.0 | 1 |
| 175 | C00074                       | Phosphoenolpyruvate                                                                | 167.0 | 79.0  | 2 |
| 176 | C00163                       | Propanoate                                                                         | 73.0  | 55.0  | 3 |
| 177 | C00584                       | Prostaglandin E2                                                                   | 351.2 | 315.3 | 3 |
| 178 | C00018                       | Pyridoxal phosphate                                                                | 246.0 | 97.0  | 3 |
| 179 | C00021                       | S-Adenosyl-L-homocysteine                                                          | 385.1 | 136.3 | 1 |
| 180 | C07588                       | Salicylic acid                                                                     | 194.1 | 150.0 | 3 |
| 181 | C00315                       | Spermidine                                                                         | 146.2 | 72.0  | 1 |
| 182 | C00750                       | Spermine                                                                           | 203.2 | 129.3 | 1 |

|     |        |                         |       |       |   |
|-----|--------|-------------------------|-------|-------|---|
| 183 | C00089 | Sucrose                 | 341.1 | 179.0 | 3 |
| 184 | C05122 | Taurocholate            | 514.3 | 123.8 | 3 |
| 185 | C00214 | Thymidine               | 243.1 | 127.0 | 1 |
| 186 | C00178 | Thymine                 | 125.0 | 42.0  | 2 |
| 187 | C00167 | UDPglucuronate          | 579.0 | 403.0 | 2 |
| 188 | C00105 | UMP                     | 323.0 | 79.0  | 3 |
| 189 | C01762 | Xanthosine              | 285.1 | 153.0 | 1 |
| 190 | C00655 | Xanthosine 5'-phosphate | 363.0 | 79.0  | 3 |
| 191 | C02470 | Xanthurenic acid        | 204.0 | 160.0 | 2 |
